# Supplementary material for: Characterization methods in porous materials for the rational design of multi-step processing in the context of a paper microfluidic phenylalanine test
Source: Royal Society of Chemistry journal article supplement (doi:10.1039/c9ay02500f), 2020-01-01

## Supporting Information

### **Characterization methods in porous materials for the rational design of multi-step processing in the context of a paper microfluidic phenylalanine test**

Lael Wentland, Rachel Polaski, and Elain Fu\*

School of Chemical, Biological, and Environmental Engineering, Oregon State University, Corvallis, OR 97331

**Table S1A.** Determining A/C Substrate Capacity. A/C glass fiber mass before and after fluid filled a 1 cm<sup>2</sup> square piece of material. The mass of water was estimated by calculating the difference.

| <b>Mass of dry A/C pad (mg)</b> | <b>Mass of wet A/C pad (mg)</b> | <b>Mass of water (mg)</b> |
|---------------------------------|---------------------------------|---------------------------|
| 5.4                             | 33.4                            | 28.0                      |
| 5.0                             | 33.4                            | 28.4                      |
| 5.2                             | 32.9                            | 27.7                      |
| 5.0                             | 33.0                            | 28.0                      |
| 5.0                             | 33.1                            | 28.1                      |

**Table S1B.** Determining A/E Substrate Capacity. A/E glass fiber mass before and after fluid filled a 1 cm<sup>2</sup> square piece of material. The mass of water was estimated by calculating the difference.

| <b>Mass of dry A/E pad (mg)</b> | <b>Mass of wet A/E pad (mg)</b> | <b>Mass of water (mg)</b> |
|---------------------------------|---------------------------------|---------------------------|
| 6.7                             | 48.1                            | 41.4                      |
| 6.8                             | 44.9                            | 38.1                      |
| 6.8                             | 43.7                            | 36.9                      |
| 6.6                             | 47.0                            | 40.4                      |
| 6.9                             | 44.7                            | 37.8                      |

**Table S2A.** Mass measurements of plasma transferred to enzymatic A/C glass fiber pad from upstream GR-PSM at different times (replicates).

| <b>Time from blood sample addition to GR-PSM</b> | <b>Mass of dry pad (mg)</b> | <b>Mass of wet pad (mg)</b> | <b>Mass of plasma (mg)</b> |
|--------------------------------------------------|-----------------------------|-----------------------------|----------------------------|
| 15 seconds                                       | 557.9                       | 562.6                       | 4.7                        |
|                                                  | 556.6                       | 561.2                       | 4.6                        |
|                                                  | 563.3                       | 568.8                       | 5.5                        |
| 1 minute                                         | 558.6                       | 564.5                       | 5.9                        |
|                                                  | 557.7                       | 563.5                       | 5.8                        |
|                                                  | 557.0                       | 562.1                       | 5.1                        |
| 2 minute                                         | 559.9                       | 565.5                       | 5.6                        |
|                                                  | 559.0                       | 564.6                       | 5.6                        |
|                                                  | 560.2                       | 565.5                       | 5.3                        |
| 3 minute                                         | 562.5                       | 567.8                       | 5.3                        |
|                                                  | 563.9                       | 569.7                       | 5.8                        |
|                                                  | 563.1                       | 569.0                       | 5.9                        |

**Table S2B.** Mass measurements of plasma transferred to enzymatic A/C glass fiber pad from upstream GX-PSM at different times (replicates).

| <b>Time from blood sample addition to GX-PSM</b> | <b>Mass of dry pad (mg)</b> | <b>Mass of wet pad (mg)</b> | <b>Mass of plasma (mg)</b> |
|--------------------------------------------------|-----------------------------|-----------------------------|----------------------------|
| 15 seconds                                       | 559.5                       | 562.8                       | 3.3                        |
|                                                  | 555.9                       | 559.3                       | 3.4                        |
|                                                  | 555.4                       | 557.6                       | 2.2                        |
| 1 minute                                         | 554.6                       | 559.0                       | 4.4                        |
|                                                  | 557.6                       | 562.1                       | 4.5                        |
|                                                  | 537.1                       | 540.9                       | 3.8                        |
| 2 minutes                                        | 554.7                       | 559.0                       | 4.3                        |
|                                                  | 553.3                       | 557.6                       | 4.3                        |
|                                                  | 559.5                       | 564.1                       | 4.6                        |

|           |       |       |     |
|-----------|-------|-------|-----|
| 3 minutes | 556.4 | 560.8 | 4.4 |
|           | 558.9 | 563.2 | 4.3 |
|           | 560.7 | 565.3 | 4.6 |

**Table S3A.** Mass measurements of plasma transferred to smaller (fluid capacity 3.1  $\mu\text{L}$ ) colorimetric A/C glass fiber pad from upstream GR-PSM after 2 minutes (replicates).

| <b>Mass of dry pad (mg)</b> | <b>Mass of wet pad (mg)</b> | <b>Mass of plasma (mg)</b> |
|-----------------------------|-----------------------------|----------------------------|
| 143.5                       | 145.1                       | 1.6                        |
| 142.6                       | 144.3                       | 1.7                        |
| 142.7                       | 144.5                       | 1.8                        |

**Table S3B.** Mass measurements of plasma transferred to larger (fluid capacity 4.2  $\mu\text{L}$ ) colorimetric A/C glass fiber pad from upstream GR-PSM after 2 minutes (replicates).

| <b>Mass of dry pad (mg)</b> | <b>Mass of wet pad (mg)</b> | <b>Mass of plasma (mg)</b> |
|-----------------------------|-----------------------------|----------------------------|
| 143.8                       | 146.4                       | 2.6                        |
| 136.2                       | 138.3                       | 2.1                        |
| 143.5                       | 145.4                       | 1.9                        |

**Figure S1.** Standard addition plot of normalized signal vs. spiked-in phenylalanine (Phe) concentration that indicates the endogenous phenylalanine concentration in the background plasma matrix (magnitude of the x-intercept) is approximately 1.3 mg/dL. (Inset) The lowest three spiked-in phenylalanine concentrations were used for the linear fit, since the curve deviates from linearity at higher concentrations.

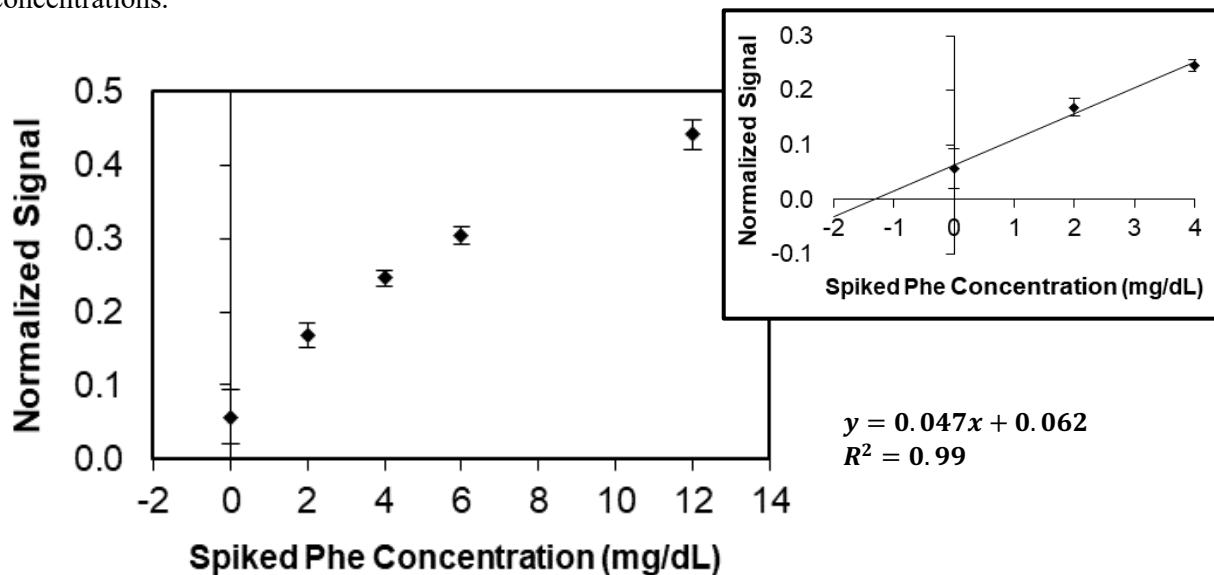

Supplement: c9ay02500f1.pdf [file c9ay02500f1.pdf]
